# Supplementary material for: Robust metal ion-chelated polymer interfacial layer for ultraflexible non-fullerene organic solar cells
Source: PubMed Central journal article supplement (PMC7481191; doi:10.1038/s41467-020-18373-0), 2020-09-09
Supplement: 41467_2020_18373_MOESM2_ESM.pdf [file 41467_2020_18373_MOESM2_ESM.pdf]

## Description of Additional Supplementary Files

Supplementary Movie 1 demonstrates the compressing-releasing cycling of an ultraflexible cell under operational condition on an apparatus.

Supplementary Movie 2 demonstrates the compressing-releasing cycling of an ultraflexible cell under operational condition on a finger joint.
