# Supplementary material for: Robust metal ion-chelated polymer interfacial layer for ultraflexible non-fullerene organic solar cells
Source: PubMed Central journal article supplement (PMC7481191; doi:10.1038/s41467-020-18373-0), 2020-09-09
Supplement: 41467_2020_18373_MOESM6_ESM.pdf [file 41467_2020_18373_MOESM6_ESM.pdf]

## Solar Cells Reporting Summary

Nature Research wishes to improve the reproducibility of the work that we publish. This form is intended for publication with all accepted papers reporting the characterization of photovoltaic devices and provides structure for consistency and transparency in reporting. Some list items might not apply to an individual manuscript, but all fields must be completed for clarity.

For further information on Nature Research policies, including our [data availability policy](#), see [Authors & Referees](#).

### ü Experimental design

#### Please check: are the following details reported in the manuscript?

##### 1. Dimensions

- Area of the tested solar cells  Yes Described in "Methods" section. The area of 4.1 mm<sup>2</sup>.  
 No
- Method used to determine the device area  Yes Described in "Methods" section. Aperture of 4.095 mm<sup>2</sup> used to determine the area. The area is confirmed by the National Institute of Metrology (NIM, Beijing).  
 No

##### 2. Current-voltage characterization

- Current density-voltage (J-V) plots in both forward and backward direction  Yes Reported in Supplementary Figure 6.  
 No
- Voltage scan conditions  Yes Described in "Methods" section. Cells are measured in both forward and backward directions with a step voltage of 0.04 V. The dwell time is 0.2 s for every point.  
*For instance: scan direction, speed, dwell times*  
 No
- Test environment  Yes Described in "Methods" section. The J-V characteristics were conducted in glove box at the temperature of 25 °C.  
*For instance: characterization temperature, in air or in glove box*  
 No
- Protocol for preconditioning of the device before its characterization  Yes No preconditioning of the device before its characterization.  
 No
- Stability of the J-V characteristic  Yes Photocurrent tracked at maximum power point for about 400 min is provided in Supplementary Figure 3.  
*Verified with time evolution of the maximum power point or with the photocurrent at maximum power point; see [ref. 7](#) for details.*  
 No

##### 3. Hysteresis or any other unusual behaviour

- Description of the unusual behaviour observed during the characterization  Yes Supplementary Figure 6 shows there is no hysteresis during the characterization.  
 No
- Related experimental data  Yes Data shown in Supplementary Figure 6 in the supplementary file.  
 No

##### 4. Efficiency

- External quantum efficiency (EQE) or incident photons to current efficiency (IPCE)  Yes EQE spectra of cells are shown in Supplementary Figure 2.  
 No
- A comparison between the integrated response under the standard reference spectrum and the response measure under the simulator  Yes Integrated EQE under AM1.5 is comparable to current density under solar simulator.  
 No
- For tandem solar cells, the bias illumination and bias voltage used for each subcell  Yes No tandem cells are reported in the work.  
 No

##### 5. Calibration

- Light source and reference cell or sensor used for the characterization  Yes Described in "Methods" section. The light source is a solar simulator (Newport, Sol3A).  
 No
- Confirmation that the reference cell was calibrated and certified  Yes Described in "Methods" section. The reference silicon cell was certified by NIST (Newport 532 ISO1599).  
 No

- Calculation of spectral mismatch between the reference cell and the devices under test  
 Yes Mismatch is not calculated.  
 No
6. Mask/aperture
- Size of the mask/aperture used during testing  
 Yes Described in "Methods" section. Aperture area of 4.095 mm<sup>2</sup> was used.  
 No
- Variation of the measured short-circuit current density with the mask/aperture area  
 Yes Described in "Methods" section. There is no variation.  
 No
7. Performance certification
- Identity of the independent certification laboratory that confirmed the photovoltaic performance  
 Yes This work focuses on a mechanically robust new interlayer.  
 No
- A copy of any certificate(s)  
*Provide in Supplementary Information*  
 Yes N/A  
 No
8. Statistics
- Number of solar cells tested  
 Yes 12 to 28 cells for different types of cells were tested.  
 No
- Statistical analysis of the device performance  
 Yes Statistical analysis are provided in Supplementary Figure 4.  
 No
9. Long-term stability analysis
- Type of analysis, bias conditions and environmental conditions  
*For instance: illumination type, temperature, atmosphere humidity, encapsulation method, preconditioning temperature*  
 Yes A cell is tested under one-sun solar simulation illumination for 200 h (Supplementary Figure 5).  
 No
